# Supplementary material
Source: Springer Nature journal article supplement (https://www.springermedizin.de/resource/supplementary/12889_2006_545_MOESM2_ESM.pdf/9501124)
Supplement: MOESM2 [file 9501124]

**Table 5: Use of condoms with three types of sex partners in the previous year according to HIV serostatus**

| Use of condoms with                               | HIV (+)   | HIV (-)   | Total     | p-value*<br>( $\chi^2$ test) |
|---------------------------------------------------|-----------|-----------|-----------|------------------------------|
| <b>Wife or girlfriend (valid response: n=118)</b> |           |           |           |                              |
| Every time                                        | 2 (5.4)   | 5 (6.2)   | 7 (5.9)   | 0.91                         |
| Almost every time                                 | 1 (2.7)   | 3 (3.7)   | 4 (3.4)   |                              |
| About half                                        | 2 (5.4)   | 3 (3.7)   | 5 (4.2)   |                              |
| Sometimes                                         | 3 (8.1)   | 11 (13.6) | 14 (11.9) |                              |
| Never                                             | 29 (78.4) | 59 (72.8) | 88 (74.6) |                              |
| <b>Casual partners (valid response: n=19)</b>     |           |           |           |                              |
| Every time                                        | 2 (33.3)  | 4 (30.8)  | 6 (31.6)  | 0.85                         |
| Almost every time                                 | 0 (0.0)   | 1 (7.7)   | 1 (5.3)   |                              |
| About half                                        | 0 (0.0)   | 0 (0.0)   | 0 (0.0)   |                              |
| Sometimes                                         | 1 (16.7)  | 1 (7.7)   | 2 (10.5)  |                              |
| Never                                             | 3 (50.0)  | 7 (53.8)  | 10 (52.6) |                              |
| <b>FSWs (valid response: n=51)</b>                |           |           |           |                              |
| Every time                                        | 7 (46.7)  | 16 (44.4) | 23 (45.1) | 0.28                         |
| Almost every time                                 | 1 (6.7)   | 10 (27.8) | 11 (21.6) |                              |
| About half                                        | 1 (6.7)   | 0 (0.0)   | 1 (2.0)   |                              |
| Sometimes                                         | 3 (20.0)  | 5 (13.9)  | 8 (15.7)  |                              |
| Never                                             | 3 (20.0)  | 5 (13.9)  | 8 (15.7)  |                              |

n indicates number; IDU, injection drug user

\*: Differences in proportions between HIV (+) IDUs and HIV (-) IDUs were tested by  $\chi^2$  tests.
